# Supplementary material
Source: ML conference proceedings conference paper supplement (https://openreview.net/forum?id=VV0hSE8AxCw)

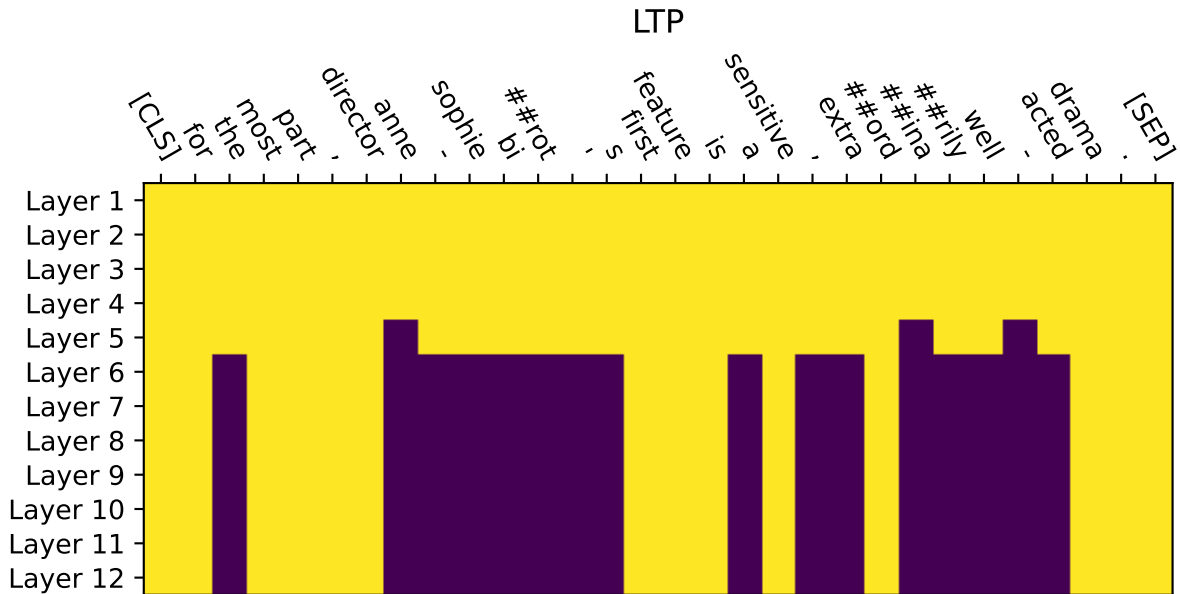

Supplement: supplementary_material [file attachment]

ImageNet-1k

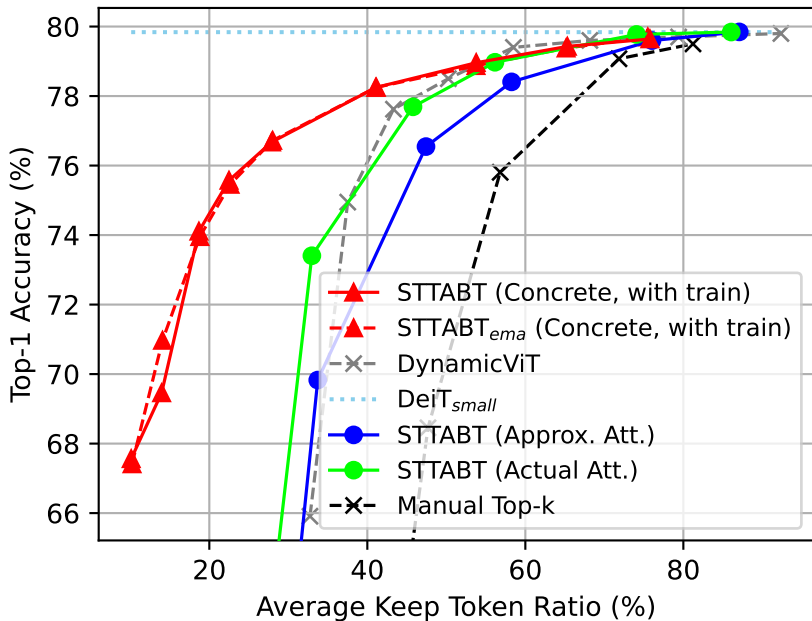

Supplement: supplementary_material [file attachment]

Average GLUE

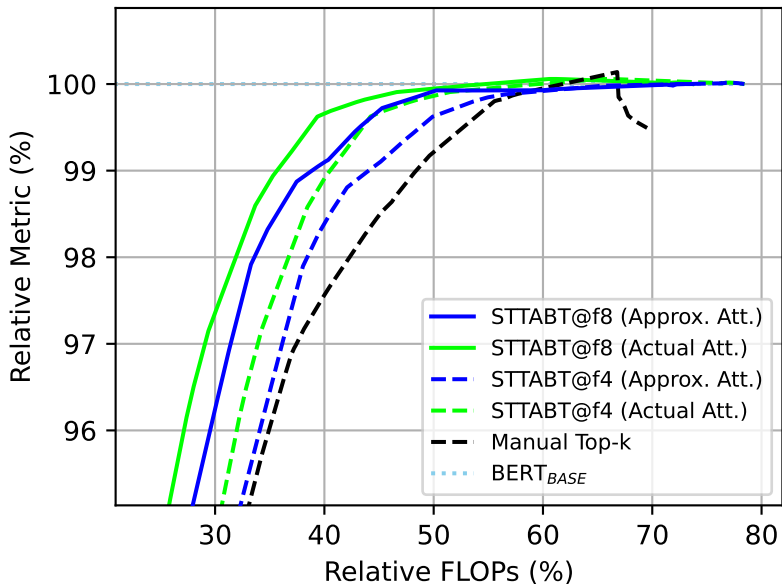

Supplement: supplementary_material [file attachment]

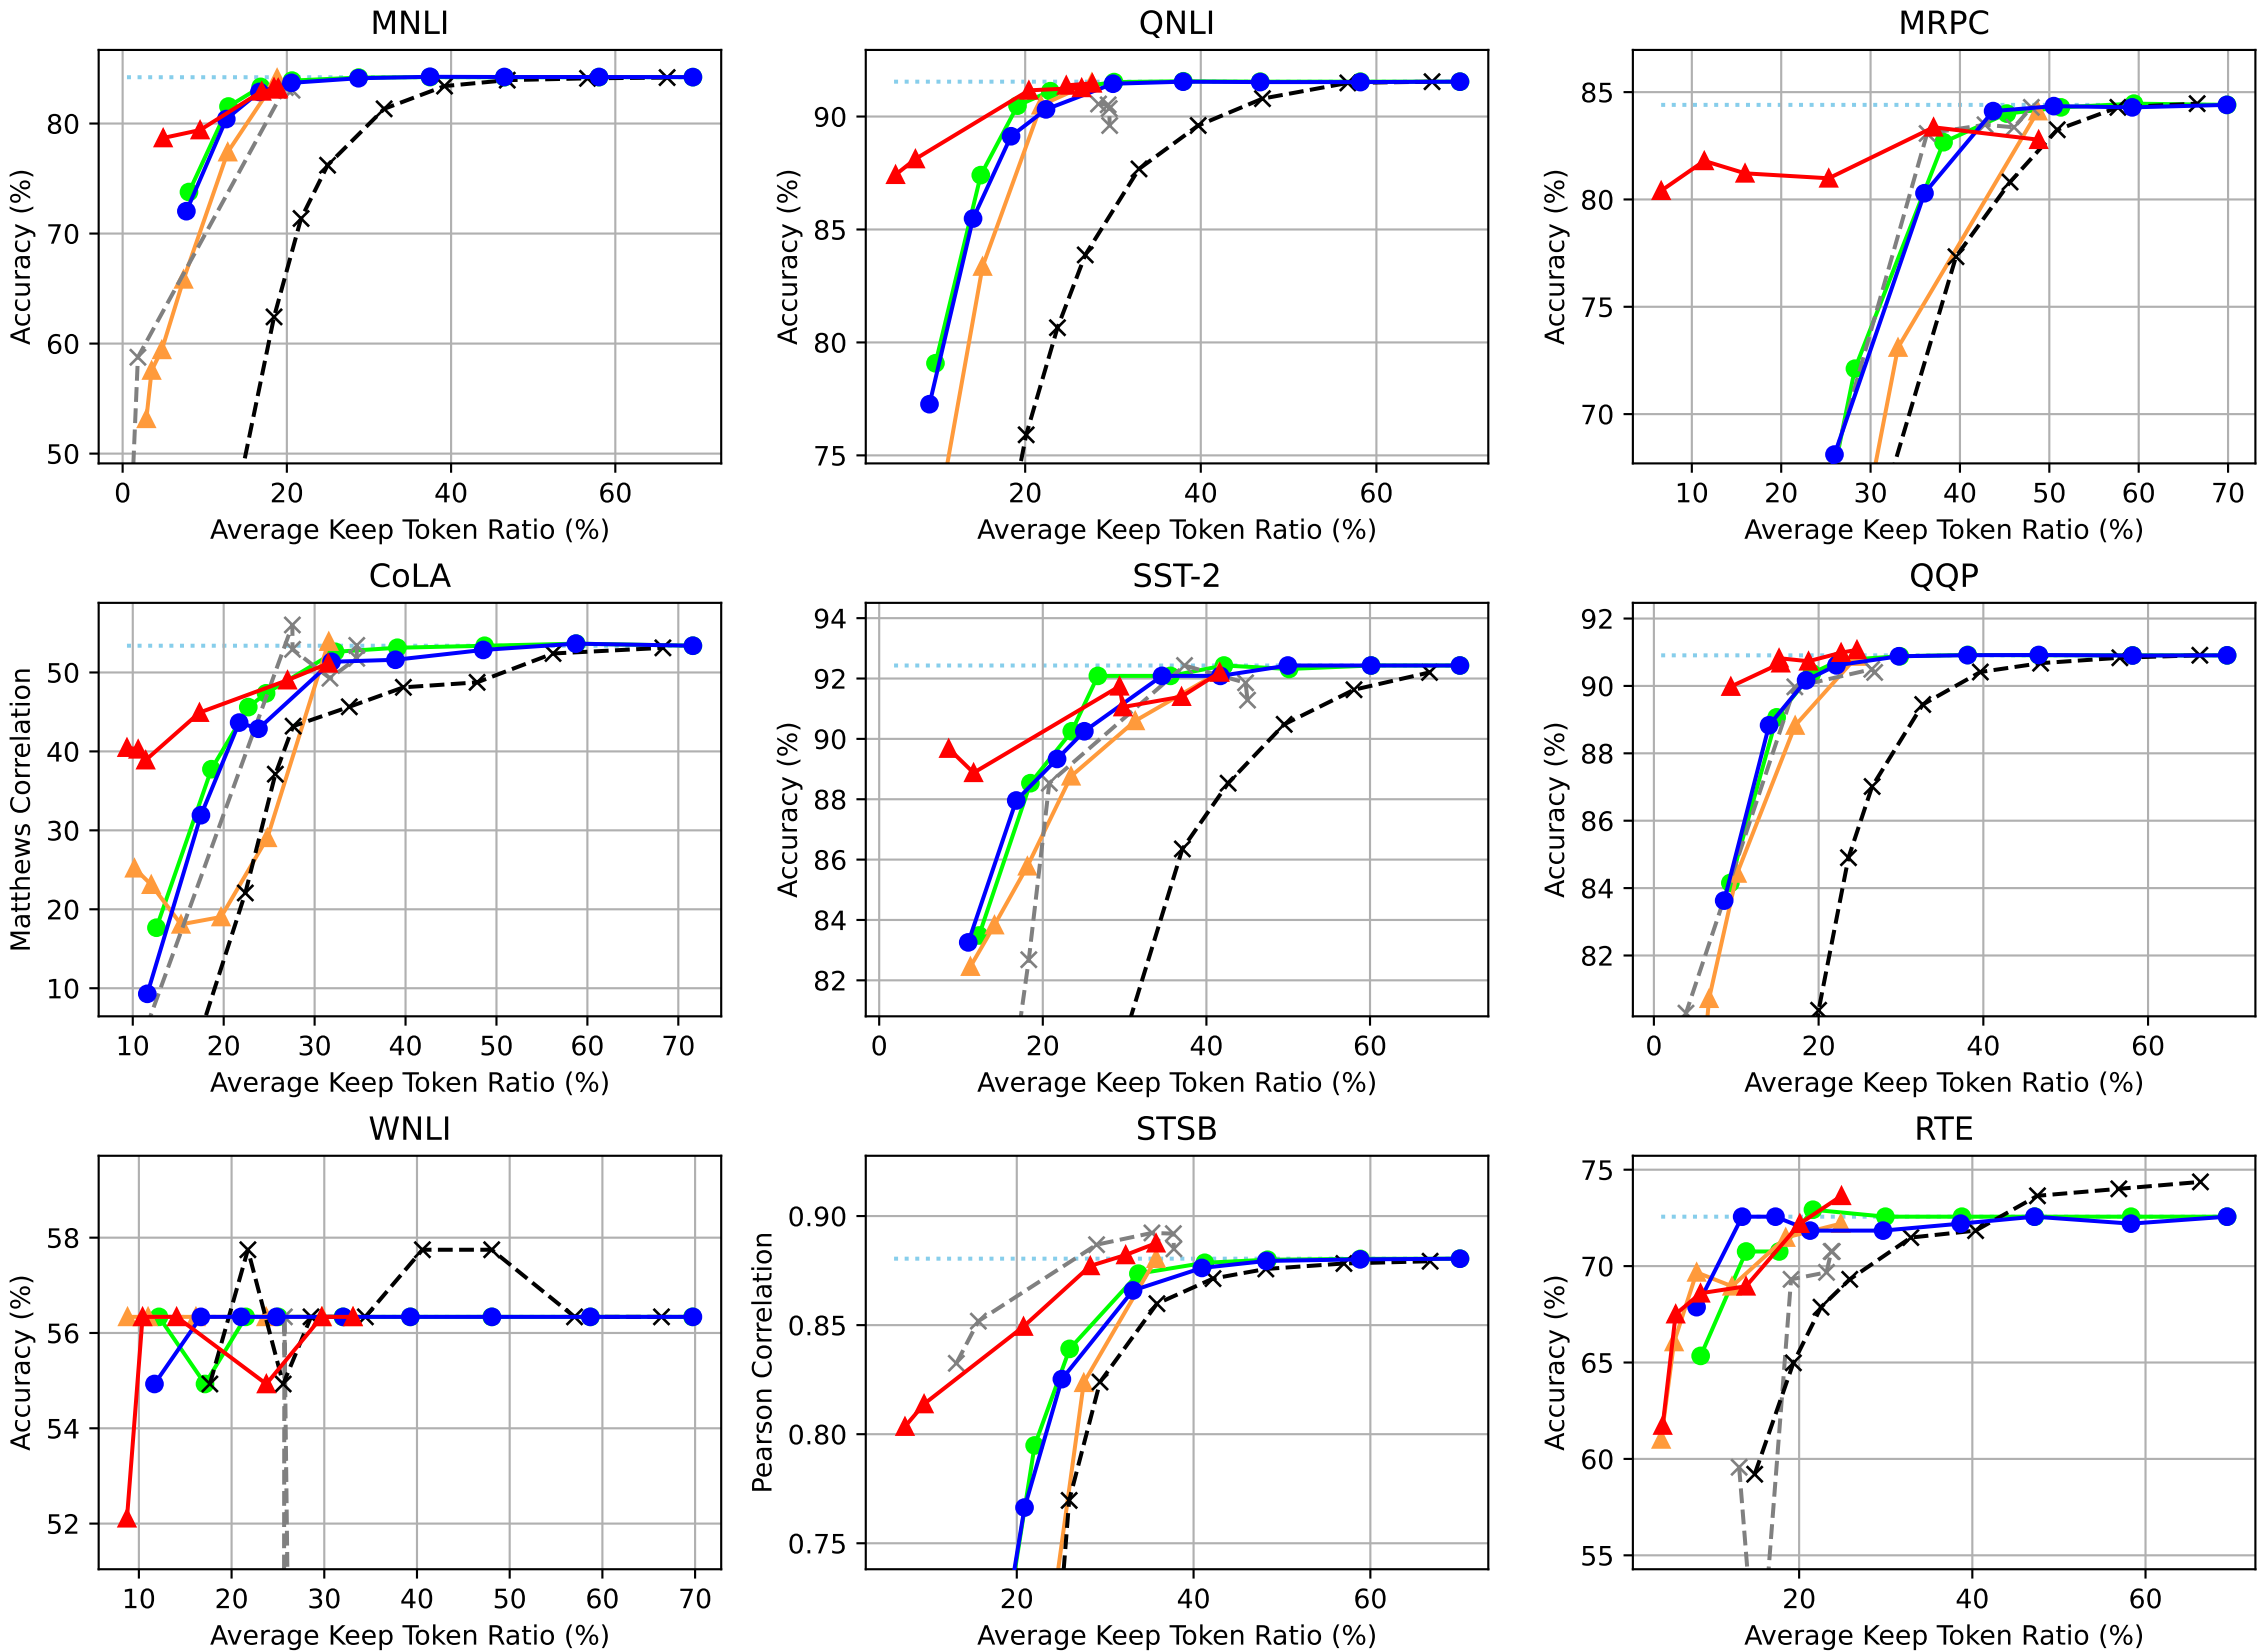

Supplement: supplementary_material [file attachment]

ImageNet-1k

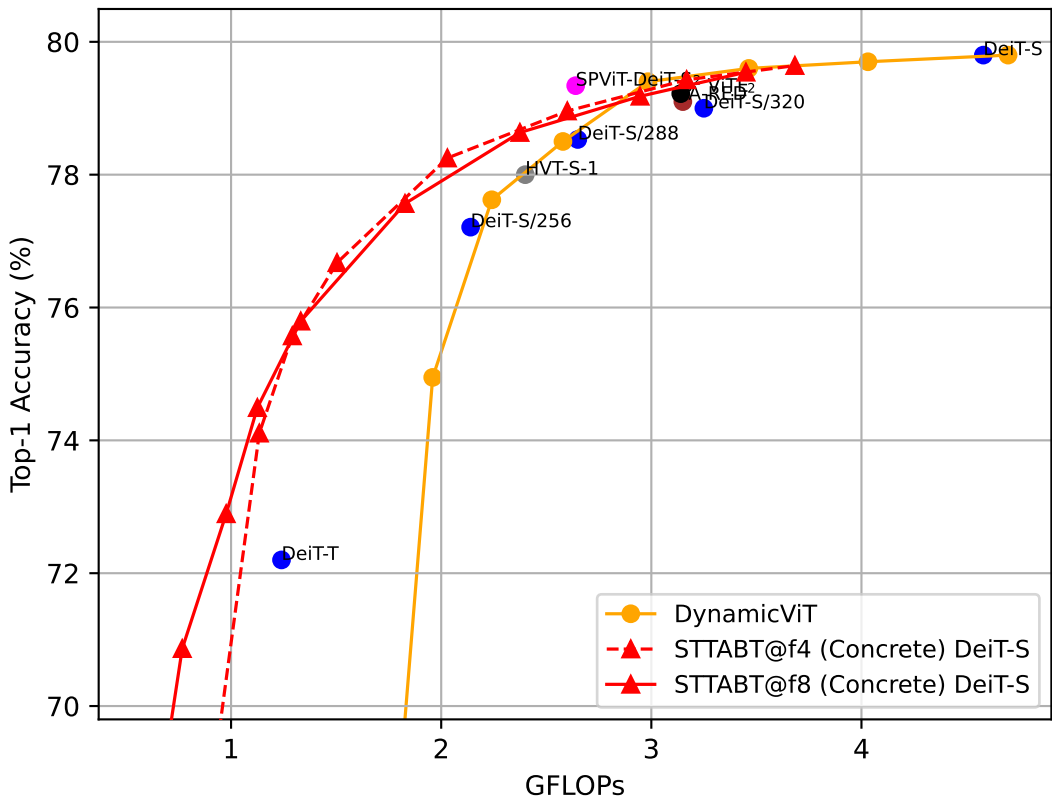

Supplement: supplementary_material [file attachment]

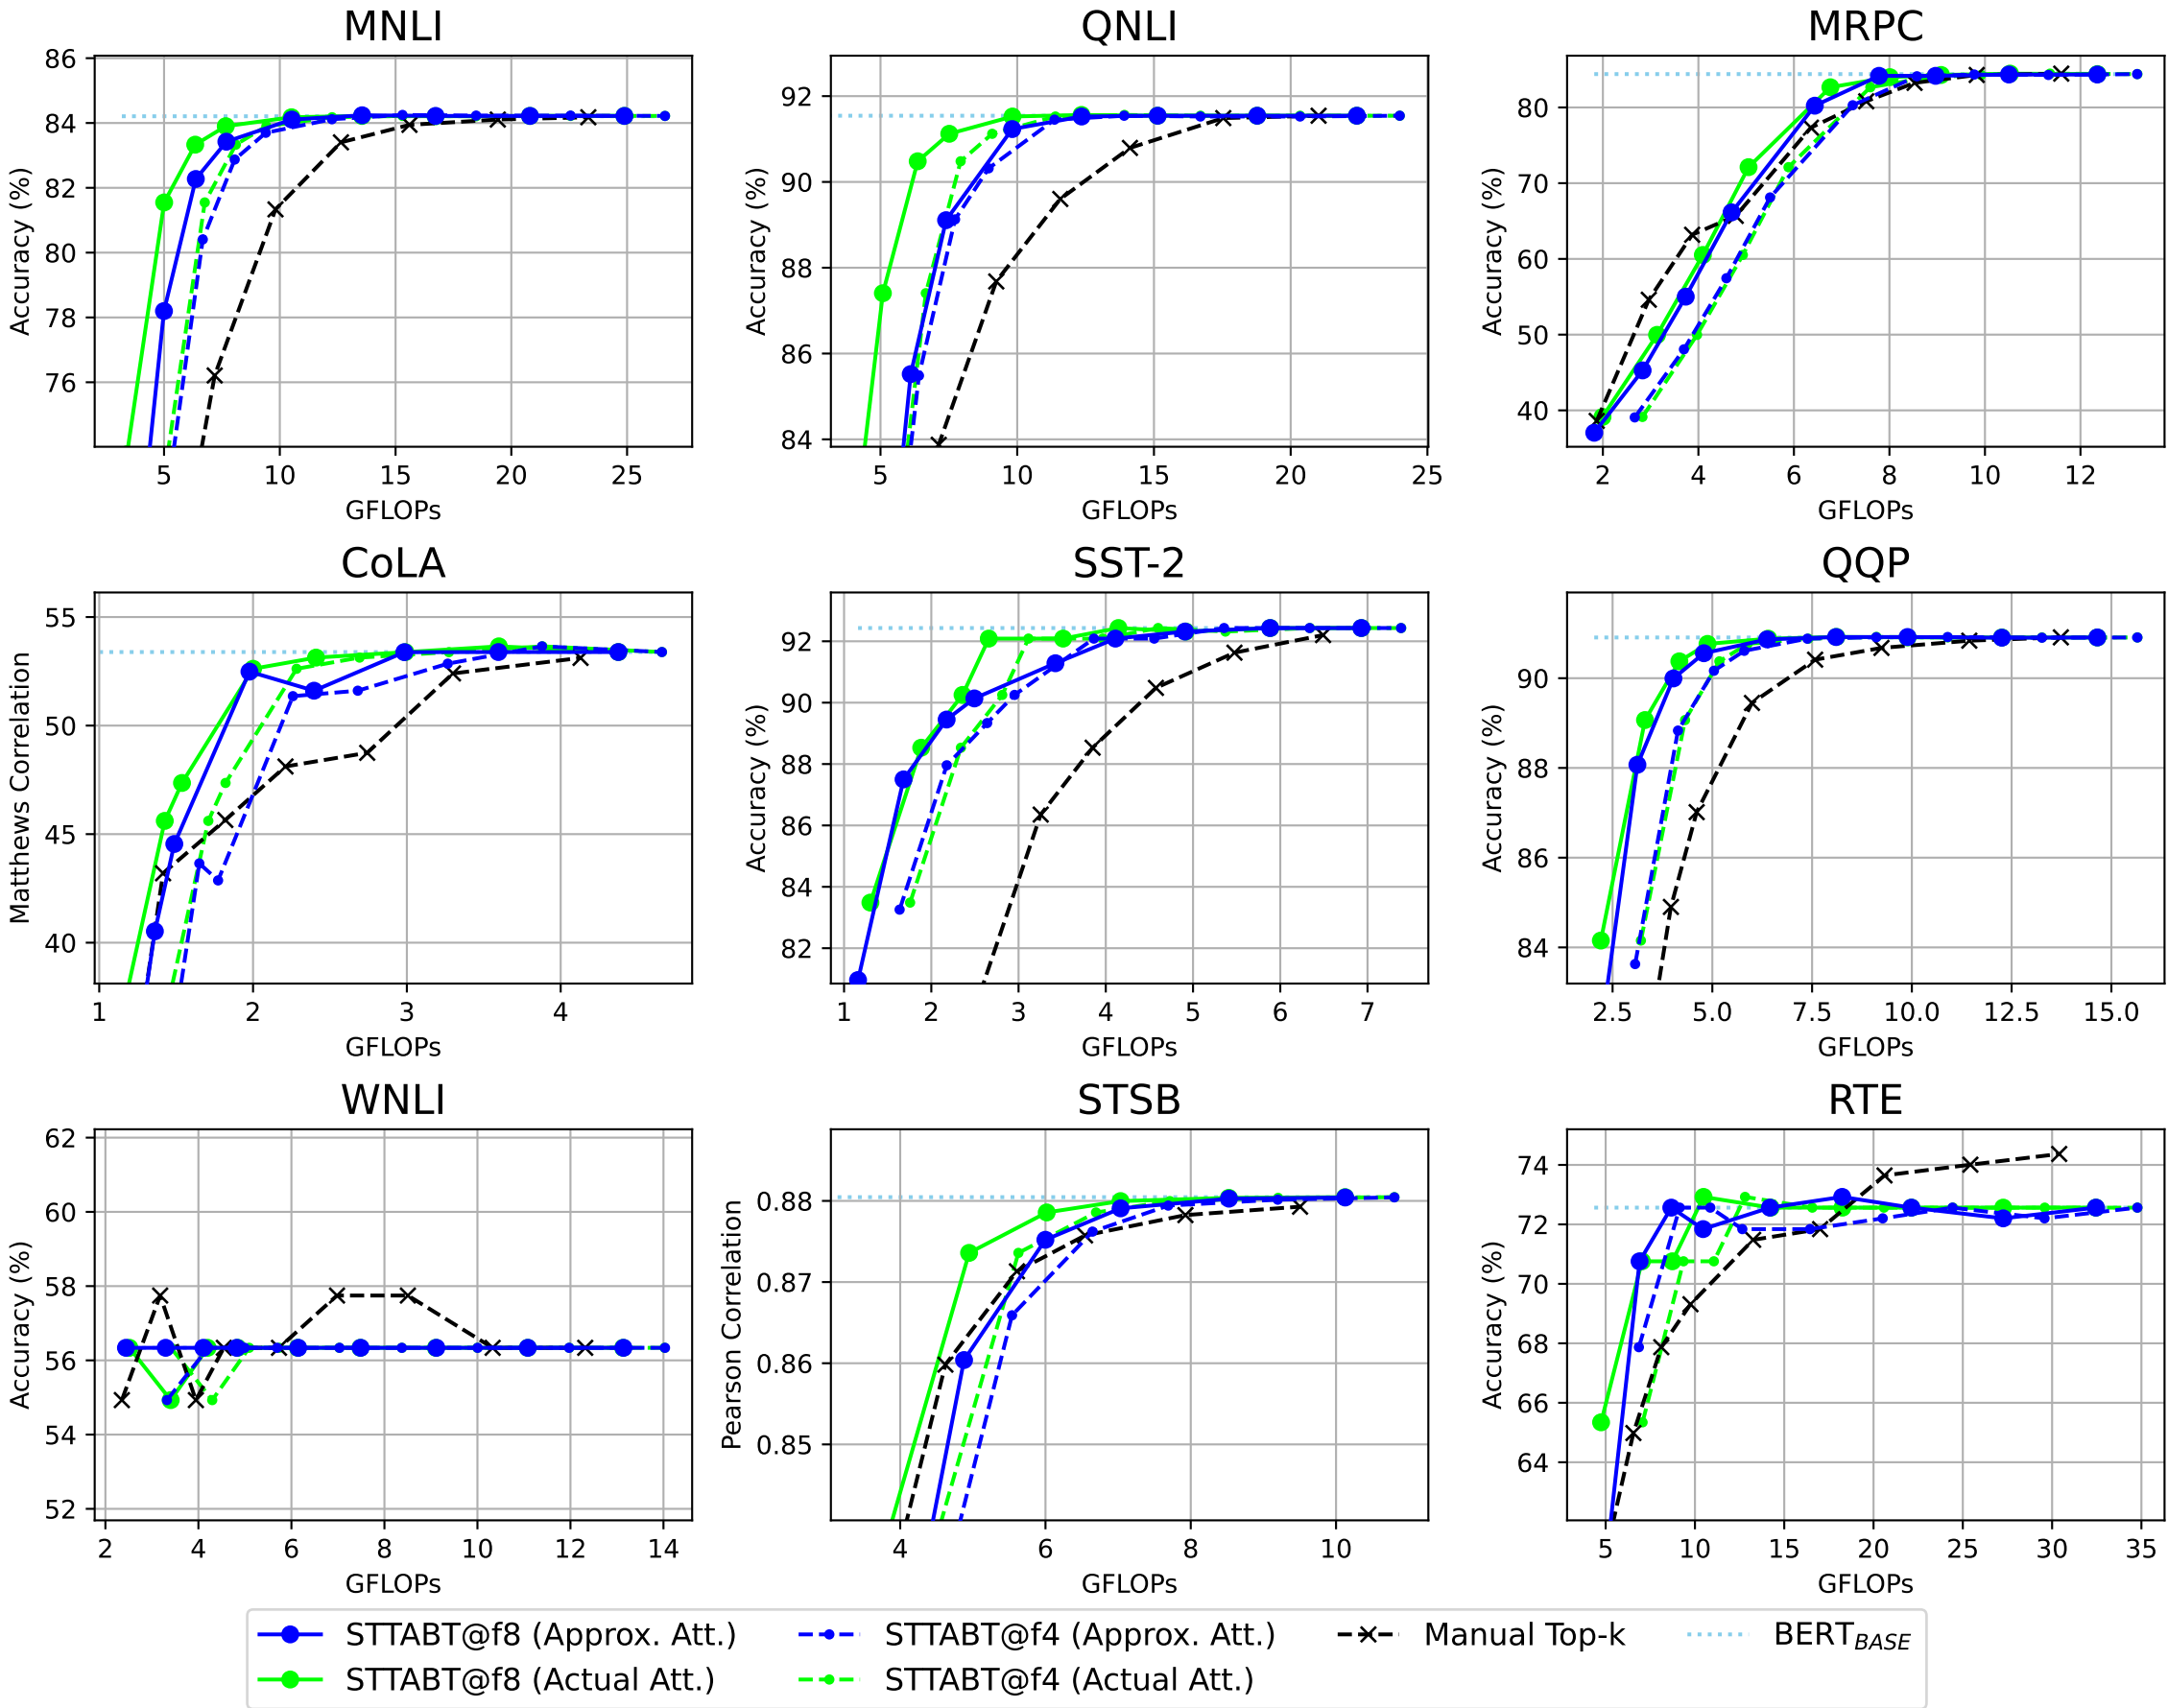

Supplement: supplementary_material [file attachment]

# ImageNet-1k

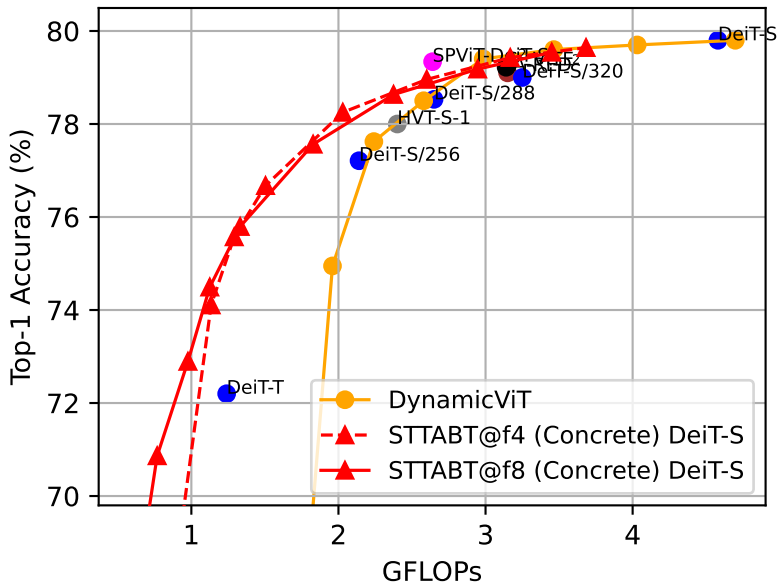

Supplement: supplementary_material [file attachment]

## STTABT (Concrete)

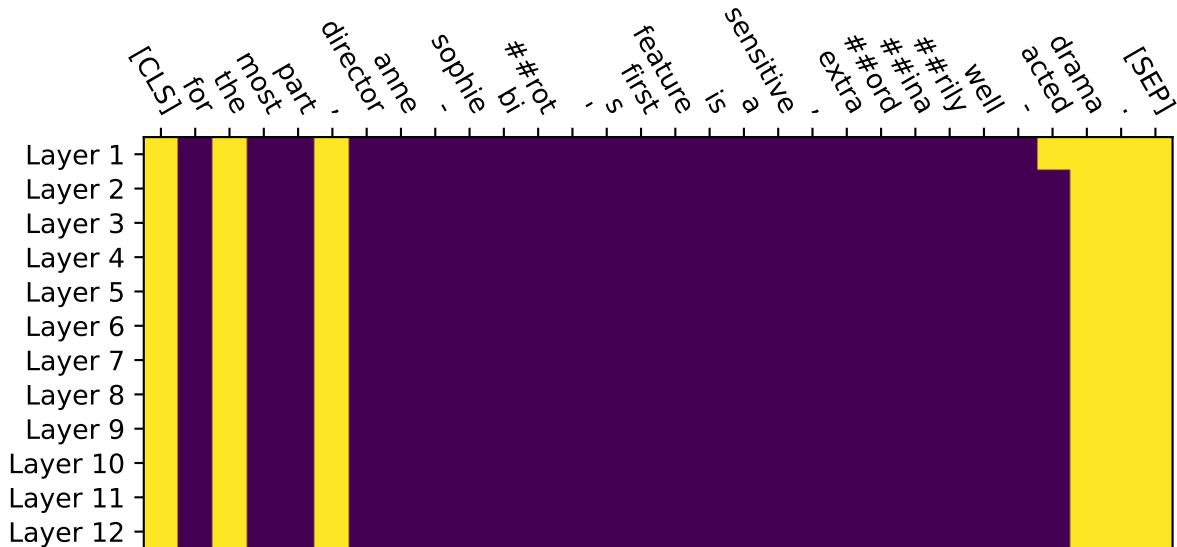

Supplement: supplementary_material [file attachment]

## STTABT (Concrete)

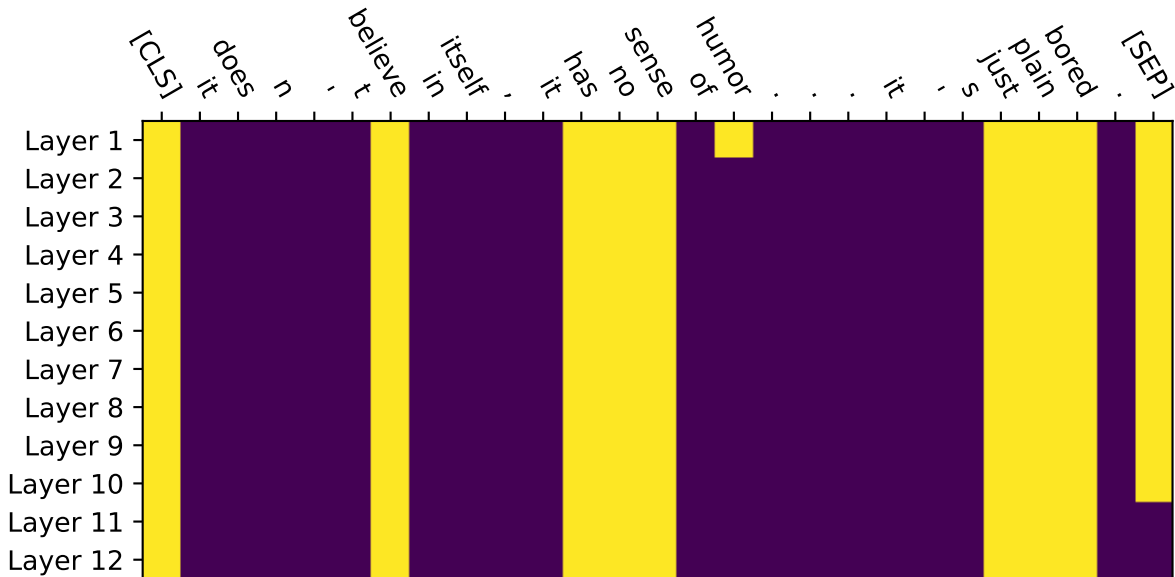

Supplement: supplementary_material [file attachment]

## ImageNet-1k

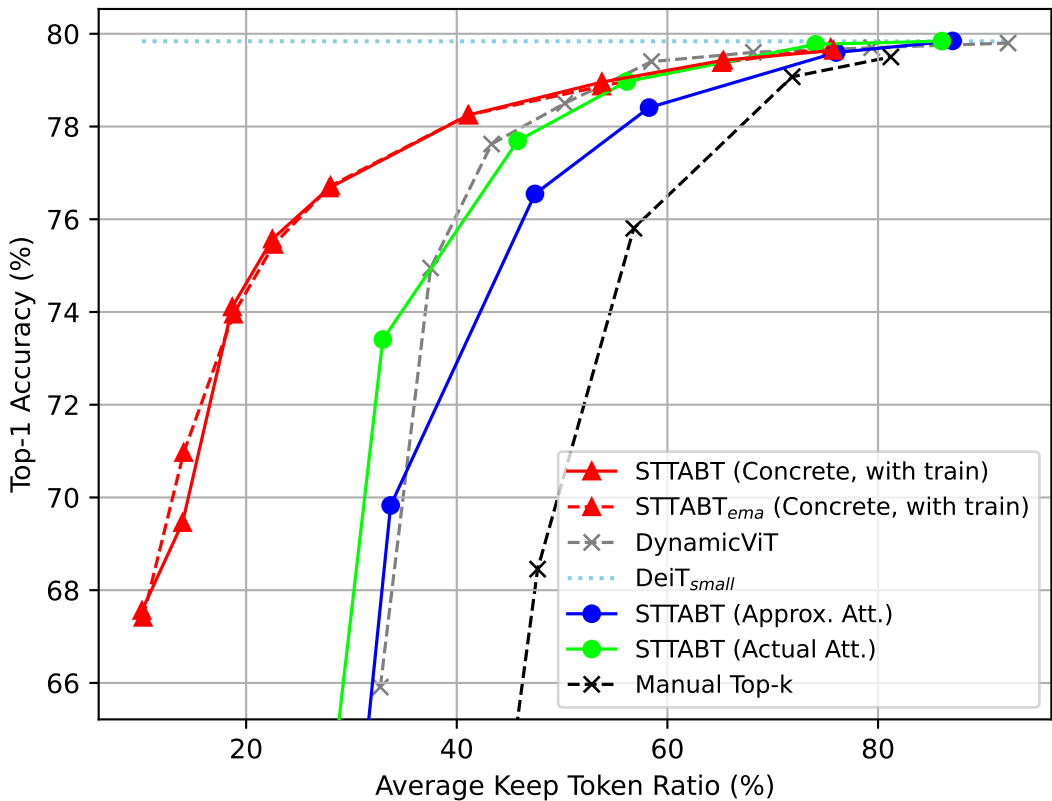

Supplement: supplementary_material [file attachment]

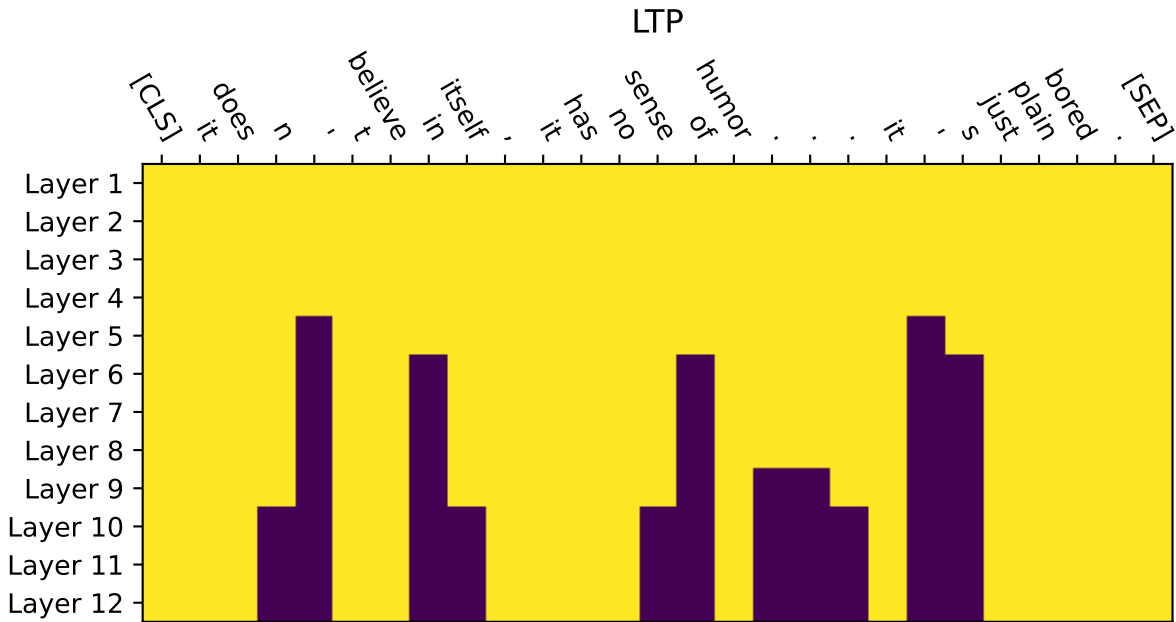

Supplement: supplementary_material [file attachment]

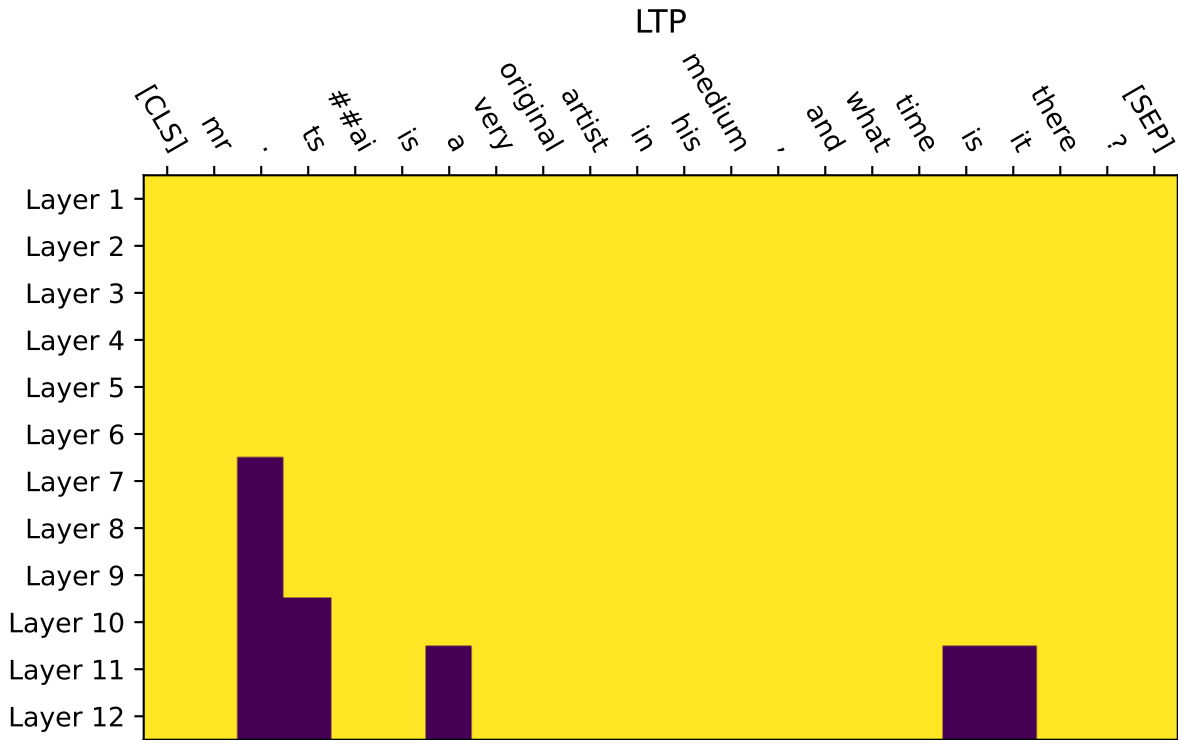

Supplement: supplementary_material [file attachment]
